# Supplementary material
Source: Research Square preprint supplement (doi:10.21203/rs.3.rs-9907255/v1)
Supplement: Supplementary file 1 [file aeeb96b4e12ee72820e24764.docx]

**TABLES**

**Table 1: Knowledge regarding Artificial Intelligence among Medical Undergraduates**

| **Knowledge Domains** | **n (%)** |
| --- | --- |
| **Overall familiarity with Artificial Intelligence (AI)**  Very familiar  Somewhat familiar  Heard of it  Not familiar | 78(21.4)  230(63.0)  52(14.2)  5(1.4) |
| **Awareness of AI tools***  ChatGPT  Gemini  Perplexity AI  Gamma AI  Grok  Copilot  Notion AI  Claude  Others / | 359(98.4)  323(88.5)  178(48.8)  87(23.8)  85(23.3)  80(21.9)  69(18.9)  54(14.8)  9(2.5) |
| **Healthcare areas in which AI is most applicable***  Medical imaging  Disease Diagnosis  Predictive analytics  Patient education  Administrative tasks  Drug discovery  Surgical assistance | 250(68.5)  236(64.5)  184(50.4)  178(48.8)  169(46.3)  151(41.4)  133(36.4) |
| **Perceived timeline for AI integration into clinical practice in India**  Already integrated  Within 5 years  Within 10 years  More than 10 years  Not sure | 51(14.0)  147(40.3)  94(25.8)  36(9.9)  37(10.1) |
| **Adequate exposure to AI in MBBS curriculum**  Yes  No | 77(21.1)  288(78.9) |
| **Confidence in explaining basic concept of AI**  Very confident  Somewhat confident  Not confident | 55(15.1)  222(60.8)  88(24.1) |

***Multiple responses permitted**

**Table 2:** **Attitude towards Artificial Intelligence in Healthcare among Medical Undergraduates (N=365)**

| **Statement** | **Strongly agree (N/%)** | **Agree**  **(N/%)** | **Neutral**  **(N/%)** | **Disagree**  **(N/%)** | **Strongly disagree (N/%)** |
| --- | --- | --- | --- | --- | --- |
| AI can assist doctors in making faster and accurate clinical decisions | 51(14.0) | 145(39.7) | 143(39.2) | 20(5.5) | 6(1.6) |
| Complete reliance on AI in patient care could be risky | 146(40.0) | 147(40.3) | 60(16.4) | 8(2.2) | 4(1.1) |
| AI will enhance efficiency and reduce medical errors | 39(10.7) | 143(39.2) | 151(41.4) | 28(7.7) | 4(1.1) |
| Use of AI may alter the traditional doctor–patient relationship | 108(29.6) | 158(43.3) | 81(22.2) | 16(4.4) | 2(0.5) |
| AI applications may influence the employment landscape for healthcare professionals in future | 97(26.6) | 172(47.1) | 74(20.3) | 19(5.2) | 3(0.8) |
| Physicians should play a leading role in guiding how AI is applied | 90(24.7) | 159(43.6) | 102(27.9) | 9(2.5) | 5(1.4) |
| AI education should be integrated into the undergraduate medical curriculum | 61(16.7) | 175(47.9) | 108(29.6) | 14(3.8) | 7(1.9) |

**Cronbach’s Alpha=0.706**

**Table 3: Practice and Engagement with AI among Medical Undergraduates (N=365)**

| **Variables** | **n (%)** |
| --- | --- |
| **Ever used AI-based applications for academic/clinical purposes**  Yes  No | 245(67.1)  120(32.9) |
| **If yes, AI tools or applications commonly used***  ChatGPT  Gemini  Perplexity AI  Grok  Meta AI  Others (Copilot, DeepSeek, Canva, Claude) | 204(83.3)  36(14.7)  20(8.2)  8(3.3)  5(2.4)  6(2.5) |
| **Have attended any workshop, webinar or elective course related to AI in healthcare?**  Yes  No | 76(20.8)  289(79.2) |
| **Frequency of interaction with AI tools**  Daily  Few times a week  Few times a month  Rarely  Never | 74(20.3)  175(47.9)  64(17.5)  46(12.6)  6(1.6) |
| **Likely to participate in a structured training program on AI**  Yes  No  Maybe | 204(55.9)  50(13.7)  111(30.4) |
| **Likely to incorporate AI-based technologies into your future medical practice**  Yes  No  Maybe | 248(67.9)  16(4.4)  101(27.7) |

***Multiple responses permitted**

**Table 4: Distribution of KAP Scores among medical students**

| **Domains** | **Mean ± SD** | **Level 1(n/%)** | **Level 2 (n/%)** | **Level 3 (n/%)** |
| --- | --- | --- | --- | --- |
| Knowledge  (0-15) | 9.22+2.23 | Good: 102 (27.9) | Moderate: 220 (60.3) | Poor: 43 (11.8) |
| Attitude  (7-35) | 24.45+3.05 | Favourable: 141 (38.6) | Neutral: 219 (60.0) | Unfavourable: 5 (1.4) |
| Practice  (0–12) | 7.44+2.13 | Adequate: 123 (33.7) | Moderate: 173 (47.4) | Inadequate: 69 (18.9) |

**Table 5: Association of KAP Levels with baseline characteristics of students (N = 365)**

| **Variable** | **Category** | **Good Knowledge**  **n (%)** | **p-value** | **Favourable Attitude**  **n (%)** | **p-value** | **Adequate Practice**  **n (%)** | **p-value** |
| --- | --- | --- | --- | --- | --- | --- | --- |
| **Age (years)** | < 22 | 99 (28.5) | 0.20 | 135 (38.9) | 0.42 | 115 (33.1) | 0.23 |
|  | >22 | 3 (16.7) | 6 (33.3) |  | 8 (44.4) |
| **Gender** | Male | 38 (33.9) | 0.06 | 44 (39.3) | 0.48 | 47 (42.0) | **0.02** |
|  | Female | 64 (25.3) | 97 (38.3) |  | 76 (30.0) |
| **Year of Study** | 1st | 34 (32.7) | 0.09 | 39 (37.5) | 0.96 | 31 (29.8) | 0.49 |
|  | 2nd | 20 (19.4) | 41 (39.8) | 33 (32.0) |
|  | 3rd | 38 (28.8) | 50 (37.9) | 51 (38.6) |
|  | 4th | 10 (38.5) | 11 (42.3) | 8 (30.8) |
| **Prior AI exposure** | Yes | 69 (39.0) | **<0.001** | 77 (43.5) | **0.04** | 81 (45.8) | **<0.001** |
|  | No | 33 (17.6) | 64 (34.0) | 42 (22.3) |

**Table 6: Correlation between Knowledge, Attitude and Practice Scores among Students (N = 365)**

| **Variable** | **Knowledge Score** | **Attitude Score** | **Practice Score** |
| --- | --- | --- | --- |
| **Knowledge Score** | 1 | 0.231** | 0.390** |
| **Attitude Score** | 0.231** | 1 | 0.361** |
| **Practice Score** | 0.390** | 0.361** | 1 |

****p < 0.01 indicates statistical significance.**
